# Supplementary material for: Integrated Molecular Profiling of Human Gastric Cancer Identifies DDR2 as a Potential Regulator of Peritoneal Dissemination
Source: PubMed Central journal article supplement (PMC4776110; doi:10.1038/srep22371), 2016-03-03

1 **Integrated Molecular Profiling of Human Gastric Cancer Identifies DDR2 as a**  
2 **Potential Regulator of Peritoneal Dissemination**

3

4 Junji Kurashige<sup>1,2</sup>, Takanori Hasegawa<sup>3</sup>, Atsushi Niida<sup>4</sup>, Keishi Sugimachi<sup>1</sup>, Niantao

5 Deng<sup>5</sup>, Kosuke Mima<sup>1,2</sup>, Ryutaro Uchi<sup>1</sup>, Genta Sawada<sup>1,6</sup>, Yusuke Takahashi<sup>1,6</sup>,

6 Hidetoshi Eguchi<sup>1</sup>, Masashi Inomata<sup>7</sup>, Seigo Kitano<sup>7</sup>, Takeo Fukagawa<sup>8</sup>, Mitsuru

7 Sasako<sup>9</sup>, Hiroki Sasaki<sup>10</sup>, Shin Sasaki<sup>11</sup>, Masaki Mori<sup>6</sup>, Kazuyoshi Yanagihara<sup>12</sup>, Hideo

8 Baba<sup>2</sup>, Satoru Miyano<sup>4</sup>, Patrick Tan<sup>5</sup>, Koshi Mimori<sup>1</sup>

9

10 **Supplementary Figure Legends**

11 **Supplementary Figure 1**

12 **Establishment of high peritoneal disseminated gastric cell lines.**

13 (a) Four cell lines with high peritoneal disseminated characteristics were isolated from

14 each parental cell using 12 repeating cycles of orthotopic transplantation directly into

15 the gastric wall in nude mice. (b) Mice implanted with parental HSC-58 cells had few, if

16 any, nodules and no apparent accumulation of ascites (left), and those implanted with

17 disseminated 58As9Luc cells formed disseminated nodules with ascites in the

18 peritoneum (right). Red arrows are tumors on the gastric wall, and the white arrows are

19 peritoneal nodules. (c) H&E staining of histological sections from an orthotopic tumor

1 formed by HSC-58 at gastric wall (top), an orthotopic tumor formed by 58As9Luc cells  
2 at gastric wall (middle), and peritoneal nodules formed by 58As9Luc cells (bottom).  
3 Scale bar, 50  $\mu$ m. (d) 40 sets of the genes are highly (top 50, 100, 200, and 400)  
4 upregulated or downregulated between each of the four pairs of parent and derived cell  
5 lines and also between all parents and derived.

6

## 7 **Supplementary Figure 2**

### 8 **A flow chart of our EEM analysis**

9 At first, we performed EEM analysis of the 40 gene sets in the gastric tumor expression  
10 data set (200 Singapore clinical set) and then obtained 18 significant gene sets by a  
11 threshold ( $p < 1.0e-6$ ). Second, we additionally applied EEM analysis to 1,981 gene sets  
12 that are registered as the GO and curatedCp entries in MSigDB, namely, 2,021  
13 (=40+1,981) gene sets in total. Among these gene sets, only 139 gene sets were selected  
14 as significant by a threshold ( $p < 1.0e-6$ ). The significant cell line-derived gene sets  
15 were then subject to statistical tests while all significant gene sets were subjected to a  
16 clustering analysis.

17

## 18 **Supplementary Figure 3**

1 **DDR2 had a higher expression in 58As9Luc than in HSC-58 cell line.**

2 (a) The DDR2 expression in HSC-58 and 58As9Luc were confirmed by qRT-PCR, (b)  
3 by western blotting, and (c) by immunohistochemistry of the mouse model.

4

5 **Supplementary Figure 4**

6 **Suppression of DDR2 reduced migration and invasion in MKN7 cell line.**

7 (a) The expression of *DDR2* mRNA in 10 gastric cell lines. (b) *DDR2* expression was  
8 suppressed in 58As9Luc by two independent shRNA in MKN7. (c) Effects of *DDR2* on  
9 migration and (d) invasion in MKN7.

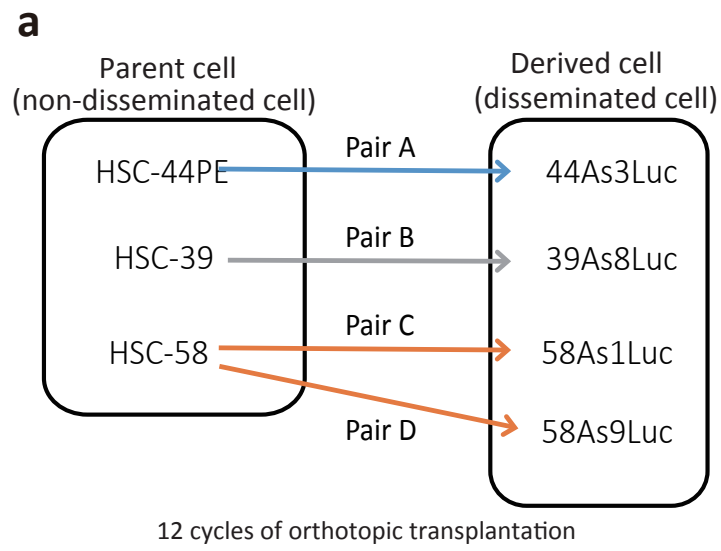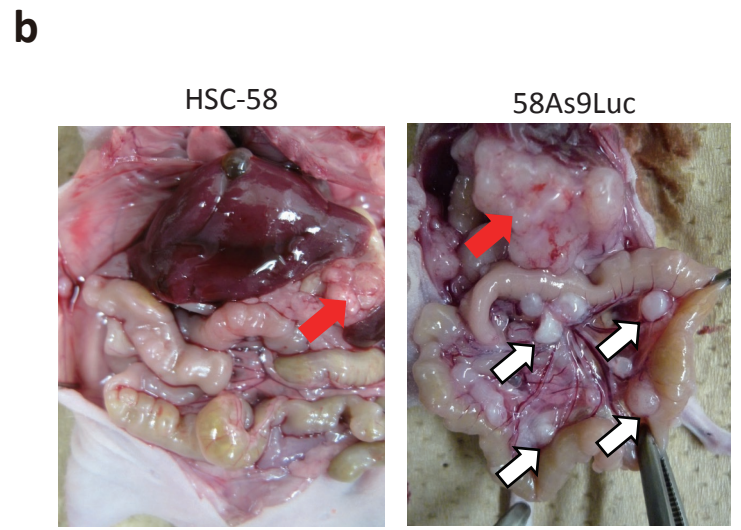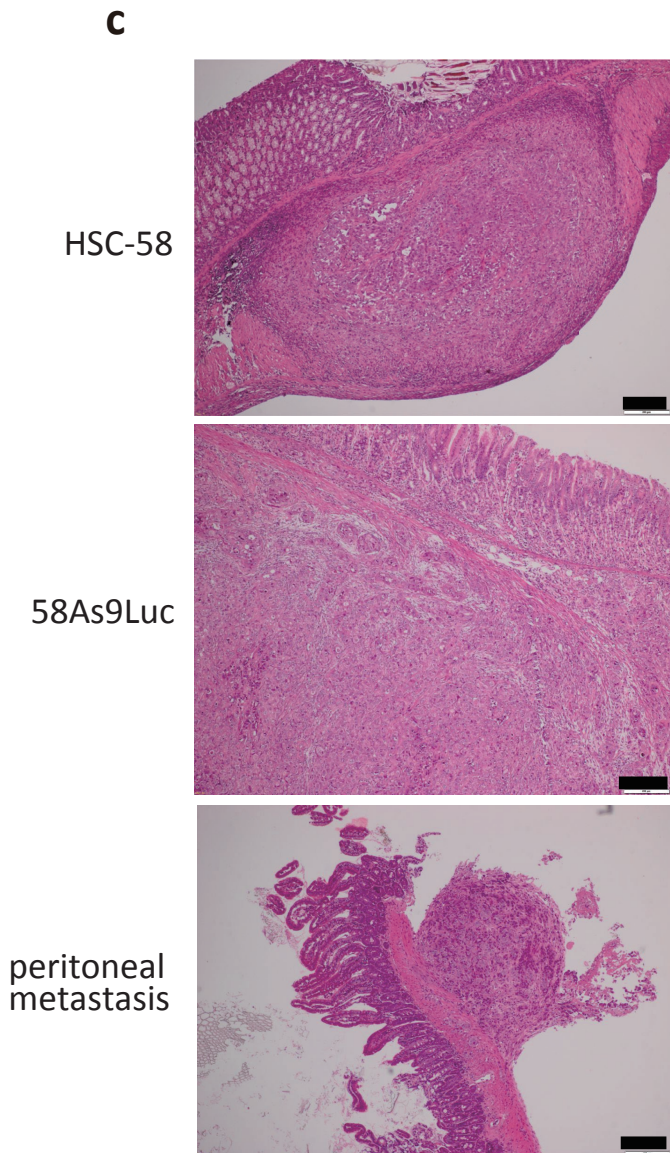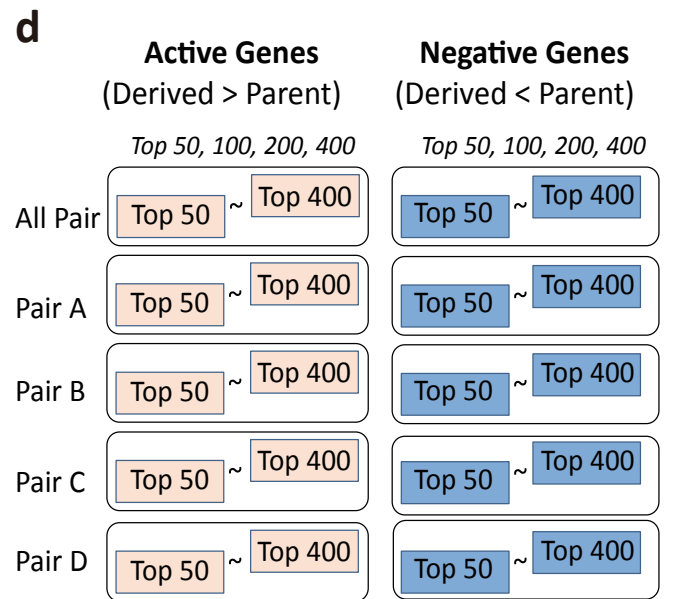

**40 Gene Sets from Cell Line**

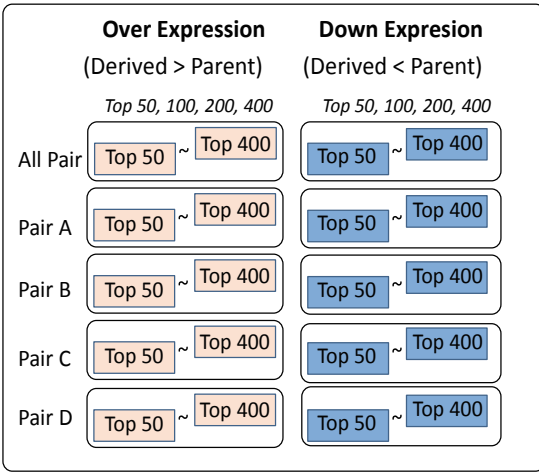

1,981 Gene Sets  
(GO and curatedCp)

Singapore  
Expression

EEM

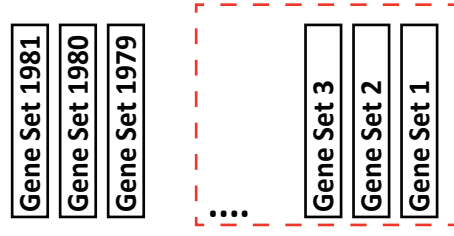

**ex) EEM Result**

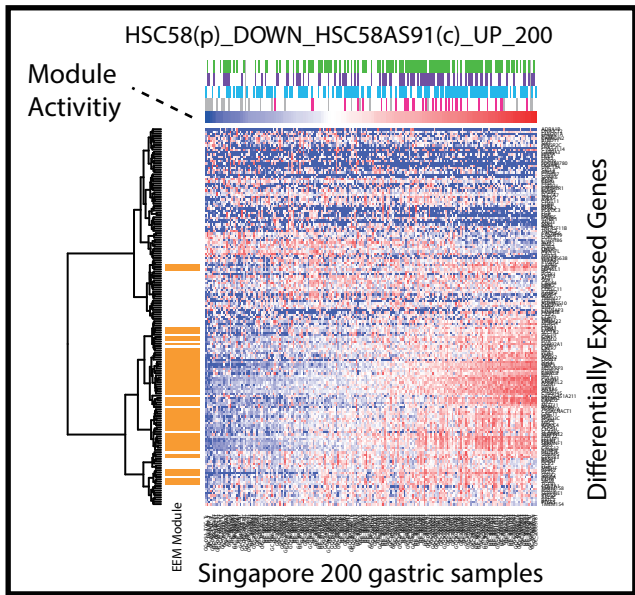

-Gene Sets with Coherent Subset and p-value  
-Average Expression of Coherent Subset (module activity)

Singapore  
Clinical Data

Gene Sets from Cell Line  
with p < 1.0e-6 (18 gene sets)

Gene Sets with  
p < 1.0e-6 (139 gene sets)

Survival Analysis

Clustering Analysis

**Statistical Test  
(module activity vs clinical data)**

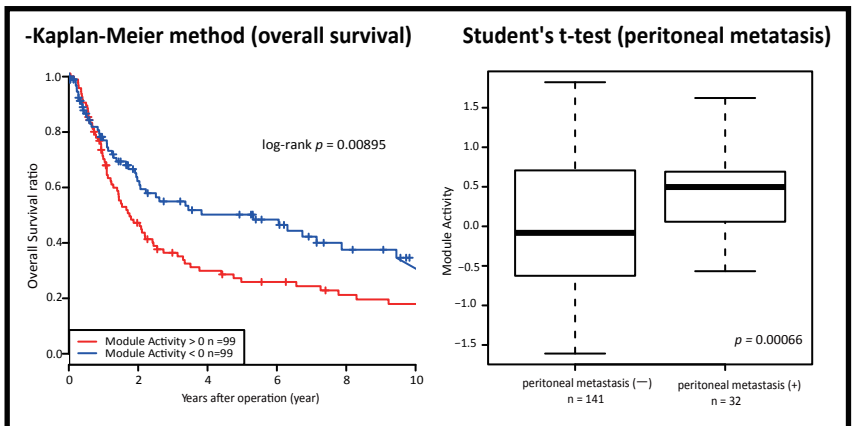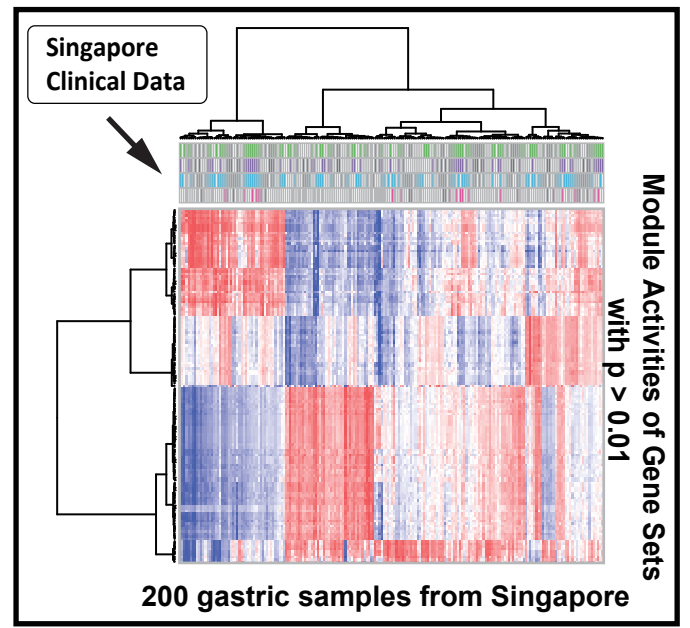

**The most significant gene set among 18 Gene Sets**

**a**

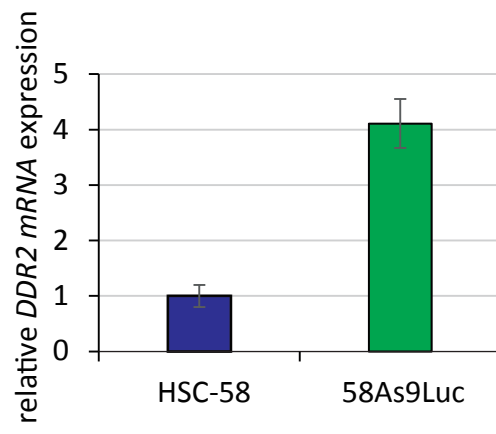

**b**

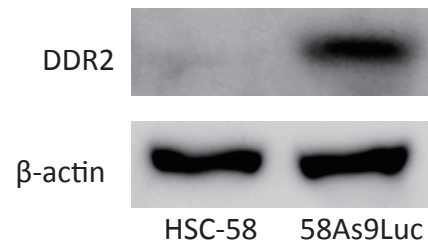

**c**

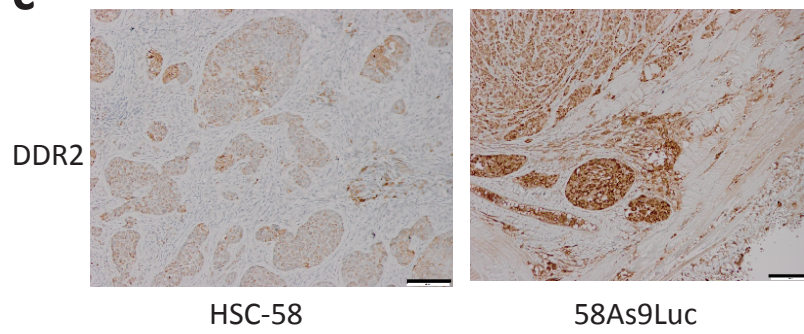

**a**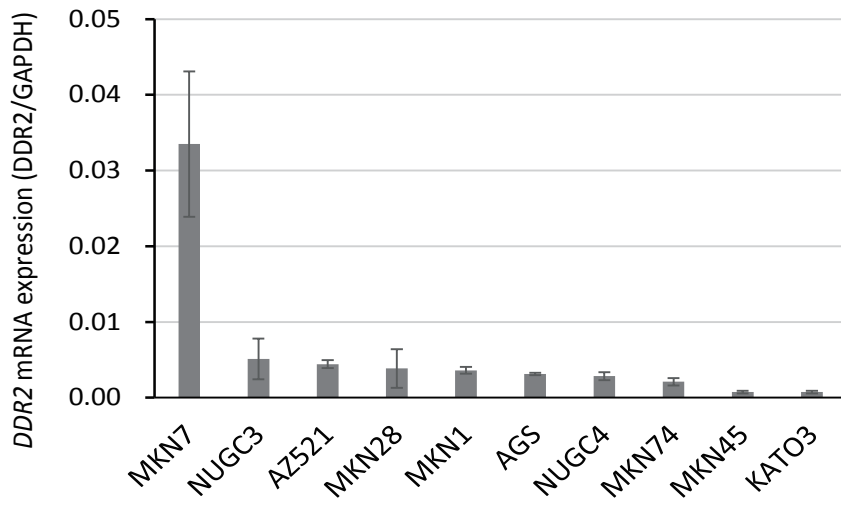**b**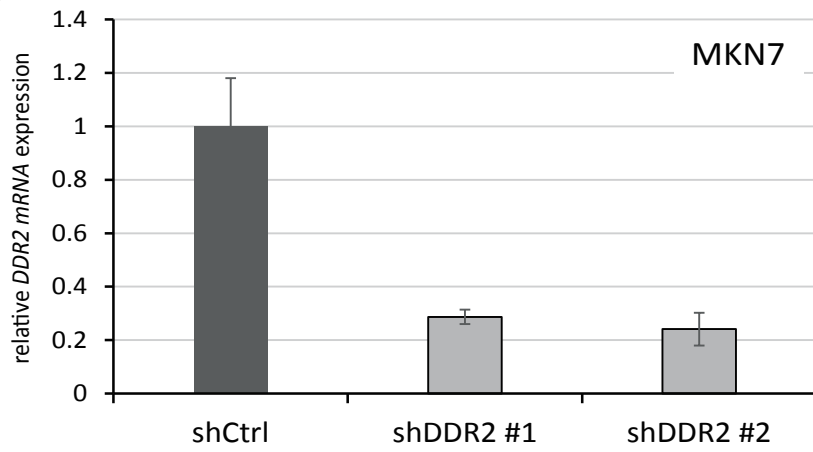**c**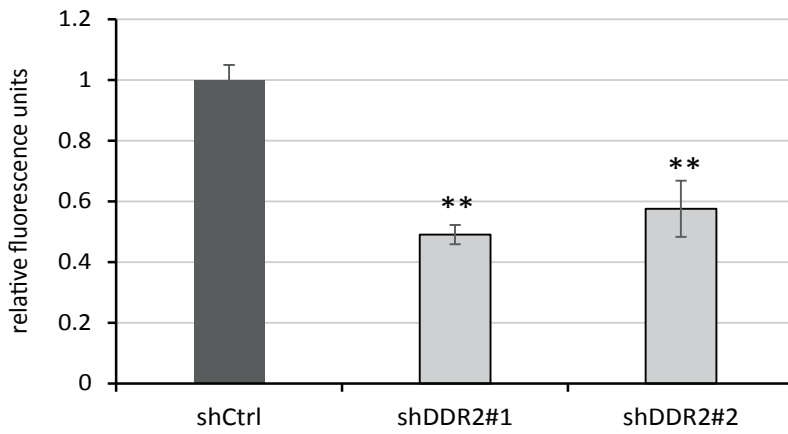**d**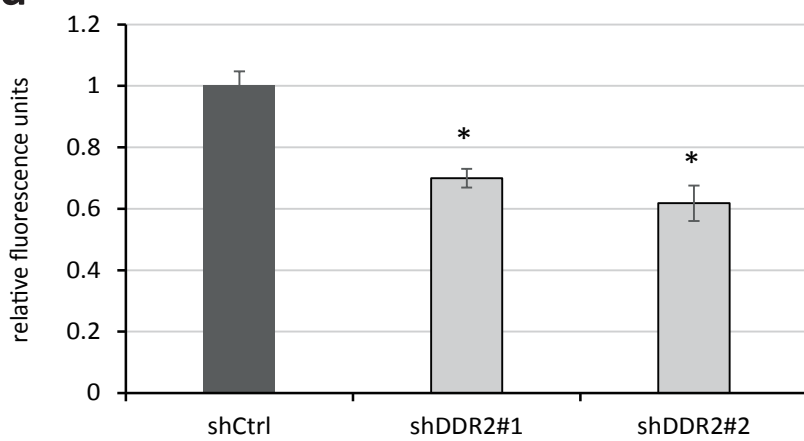

Supplement: srep22371-s1.pdf [file srep22371-s1.pdf]
